# Supplementary material for: Quantifying lahar damage using numerical modelling
Source: Copernicus journal article supplement (doi:10.5194/nhess-2016-282), 2016-09-02
Supplement: Supplementary file 1 [file nhess-2016-282-supplement.pdf]

# Quantifying lahar damage using numerical modelling: Supplementary Images

Stuart R. Mead<sup>1,2</sup>, Christina Magill<sup>1</sup>, Vincent Lemiale<sup>2</sup>, Jean-Claude Thouret<sup>3</sup> and Mahesh Prakash<sup>2</sup>

- 5 <sup>1</sup>Risk Frontiers, Department of Environmental Science, Macquarie University, Sydney, Australia  
<sup>2</sup>Commonwealth Scientific and Industrial Research Organisation, Clayton 3168, Victoria, Australia  
<sup>3</sup>Laboratoire Magmas et Volcans UMR6524 CNRS, IRD and OPGC, University Blaise Pascal, Campus Les Cézeaux, 63178 Aubière, France

Correspondence to: Stuart R. Mead ([Stuart.Mead@mq.edu.au](mailto:Stuart.Mead@mq.edu.au))

## 10 Supplementary figures

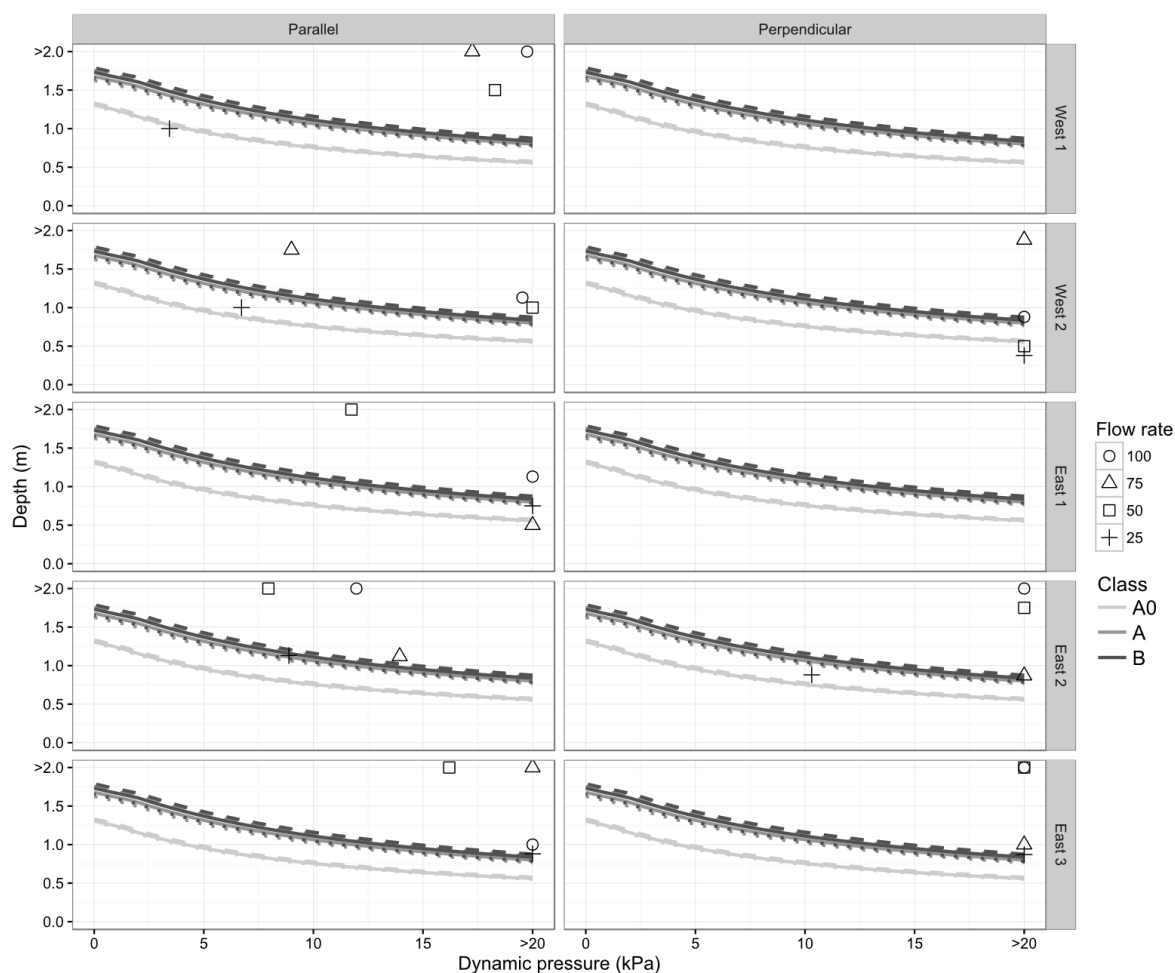

Figure 1. Critical depth-pressure curves for building classes A0, A and B with brick widths of 0.25 m subjected to Newtonian flow. Peak normal pressures and corresponding depths applied to each city block are plotted as points for each flow rate.

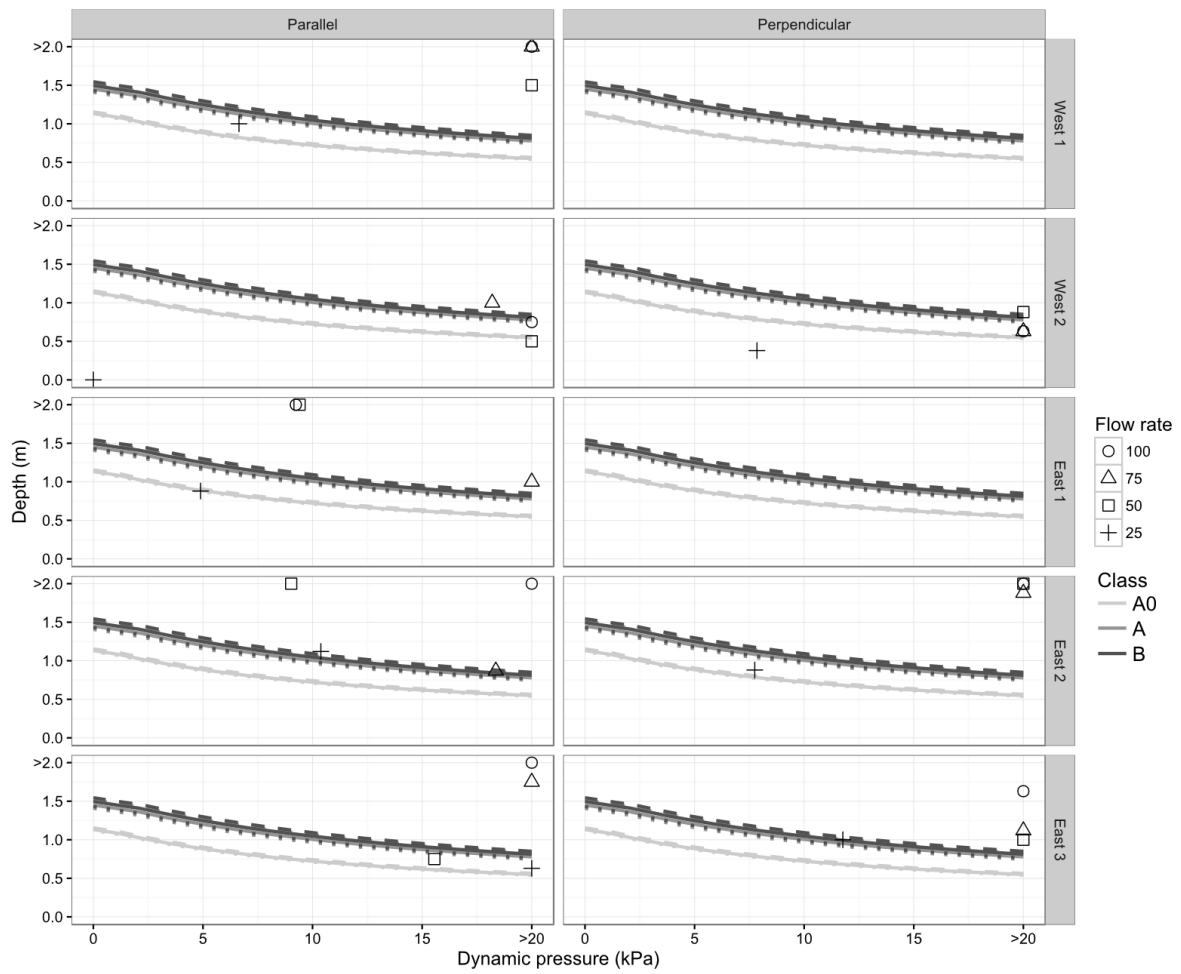

**Figure 2. Critical depth-pressure curves for building classes A0, A and B with brick widths of 0.25 m subjected to a hyperconcentrated flow. Peak normal pressures and corresponding depths applied to each city block are plotted as points for each flow rate.**

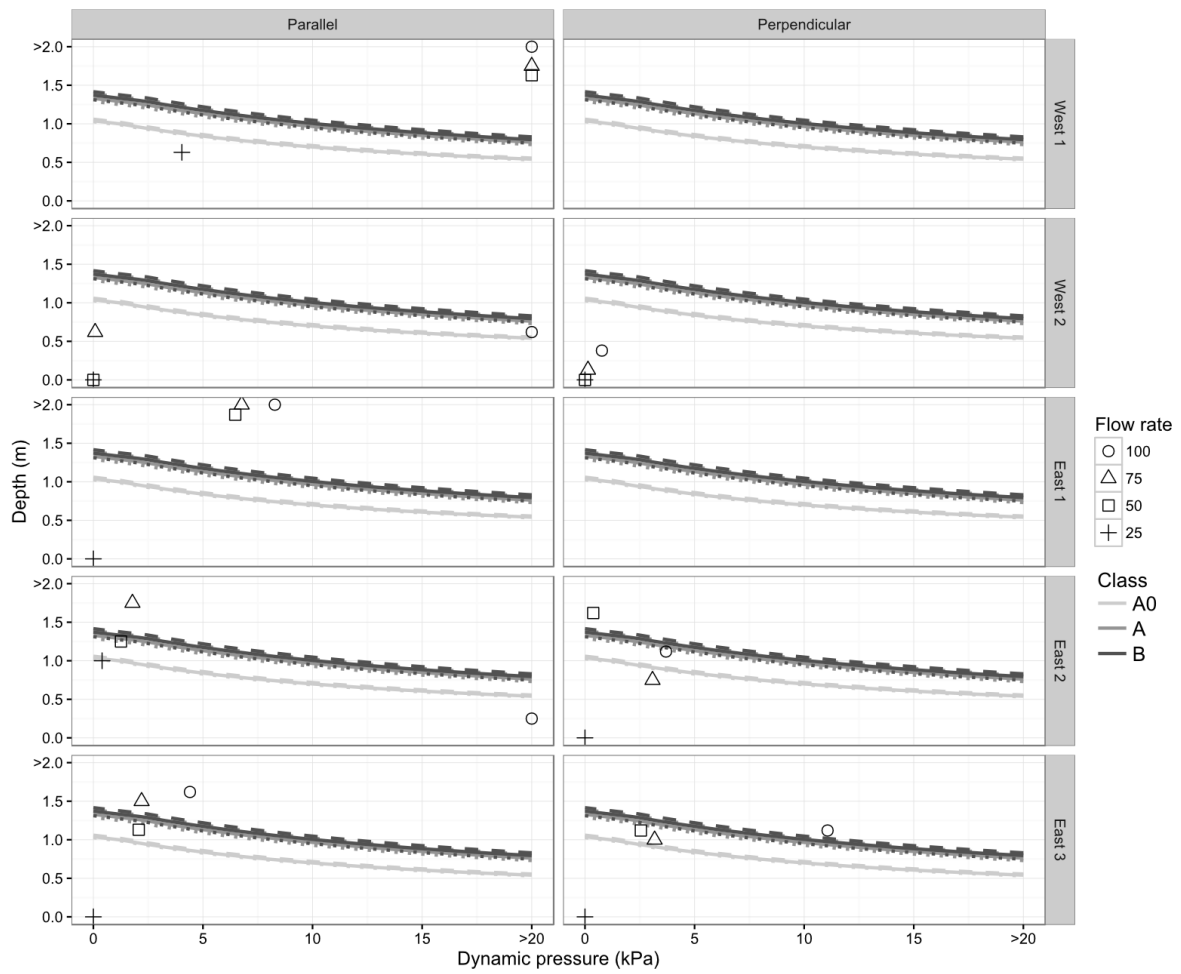

20

**Figure 3. Critical depth-pressure curves for building classes A0, A and B with brick widths of 0.25 m subjected to a debris flow. Peak normal pressures and corresponding depths applied to each city block are plotted as points for each flow rate.**
